# Supplementary material
Source: Research Square preprint supplement (doi:10.21203/rs.3.rs-9303465/v1)
Supplement: Supplementary file 1 [file a376eb81649a0b35235e8a1e.docx]

**Schaller et al.**

**SUPPLEMENTARY INFORMATION**

**SUPPLEMENTARY MATERIALS AND METHODS**

***Ultrasonic Vocalisations***

Early social communication was tested by analyzing isolation-induced ultrasonic vocalizations (USVs) in P8 pups of both sexes{Bosque Ortiz, 2022 #5979}. Briefly, the mother and litter were left together for 30 min to habituate to the testing room, then P8 pups were all isolated from the mother and gently transferred to a new cage on a heating pad (37°C). After 5 min of separation, each pup was transferred in an isolation box located inside an anechoic box (54 x 57 x 41 cm; Couldbourn instruments, PA, USA). USVs were recorded for 300 s by an ultrasonic microphone (Avisoft UltraSoundGate condenser microphone capsule CM16/CMPA, Avisoft bioacustic, Germany) sensitive to frequencies of 10-250 kHz. Recordings were done using Avisoft recorder software (version 4.2) with a sampling rate of 250 kHz in 16-bit format. Data were analyzed for the total number of calls using Avisoft SASLab software.

***Rotarod.*** Mice were challenged to walk on a rotating rod that increases in speed over a predetermined period of time (for 5 min) until the animal falls. The latency to fall from the rod is determined and taken as a measure of motor function. The test is performed over three successive days. The daily trial consists of three measures spaced by 5 minutes, a mean of the three measures is considered for each day.

***Elevated plus maze.*** The device consists of a labyrinth of 4 arms of 5 cm width located 80 cm above the ground. Two opposite arms are open (without wall) while the other two arms are closed by side walls. The light intensity was adjusted to 20 Lux on the open arms. Mice were initially placed on the central platform and left free to explore the cross-shaped labyrinth for 5 minutes. The maze was cleaned and wiped with H2O and with 70% ethanol between each mouse. Animal movement was video-tracked using Ethovision software 11.5 (Noldus). Time spent in open and closed arms, the number of entries in open arms, as well as the distance covered, are directly measured by the software.

***Open field.*** The open field test was performed in a 40 x 40 cm square arena with an indirect illumination of 60 lux. Mouse movement was video-tracked using Ethovision software 11.5 (Noldus) for 10 minutes. Total distance traveled and time in center (exclusion of a 5 cm border arena) are directly measured by the software. Grooming (time and events) and rearing were manually counted in live using manual functions of the software, by an experimented behaviourist. The open-field arena was cleaned and wiped with H2O and with 70% ethanol between each mouse.

***Spontaneous Social Interaction in an open field arena.*** Animals were first habituated to the apparatus for 30 min. Social interaction was measured using pairs of mice from different housing cages, and having the same genotype, the same gender, and approximately the same body weight. Each pair was placed in the open field arena for 15 min during which different behavioural parameters reflecting social interaction between the two mice were recorded (following and sniffing). A social interaction index was defined as the percentage of counts and duration of social events over the total social and individual events.

***New object recognition.***First, two identical objects are placed in the arena, and then one of these objects is replaced by a novel object. Normal mice are expected to spend more time exploring the novel object than the familiar one. The arena used for the novel object recognition test was the same used for the open-field test. The arena was cleaned and wiped with 70% ethanol between each mouse. Two identical objects (50 ml orange corning tube) were placed in the opposite corners of the arena, 10 cm from the side walls. The tested mouse was placed at the opposite side of the arena and allowed to explore the arena for 10 min. After 1h, one object was randomly replaced with another novel object, which was of similar size but differ in the shape and color with the previous object (white and blue lego bricks), the other object (same object) was kept. Then, the same mouse was placed in the arena and allowed to explore the two objects (a new and an "old" familiar object) for 10 min. The movement of the mice was video-tracked with Ethovision 11.5 software. Time of exploration of both objects (nose located in a 2 cm area around object) was automatically measured by the software. The traveled distance to reach the novel object or the same object (old object) was measured.

***Three-chamber social preference test.*** The three-chamber apparatus consisted of a Plexiglas box (50x25 cm) with removable floor and partitions dividing the box into three chambers with 5-cm openings between chambers. The task was carried out in four trials. The three-chambers apparatus was cleaned and wiped with 70% ethanol between each trial and each three-chamber test experiments. The mouse was video-tracked using Ethovision software. In a 5 minutes habituation trial, the tested mouse was placed in the central part of the 3-chamber unit and freely explore the two empty wire cages located in the left and right chambers (duration in each chamber). In the second 10 minutes socialization trial, a “stranger” wild-type mouse (same sex and same age, S1) is placed randomly in one of the two wire cages. The second wire cage remains empty. Social recognition is analysed during the third 10 minutes trial, in which a second “stranger” mouse (S2) is placed in the second wire cage. The S1 mouse is still under the first wire cage and corresponds to the familiar mouse. Thus, the tested mouse will have the choice between a familiar mouse (S1) and a new stranger mouse (S2). After a 30 minutes delay, the M2 mouse is replaced by another “stranger” mouse (S3) to test social memory. The measure of the real social contact is represented by the time spent in nose-to-nose interactions with the mouse. This test was performed using grouped-house mice.

**Metabolic phenotyping**

Animals were weighed at postnatal day 100 (P100) using an analytical balance. Perigonadal white adipose tissue was carefully dissected and weighed immediately after sacrifice using an analytical balance. Samples were fixed in 4% paraformaldehyde for 24 h at 4 °C and then dehydrated and paraffin-embedded using an automated tissue processor (Shandon Citadel™, Thermo Fisher Scientific). The dehydration sequence consisted of the following successive baths: 70% ethanol (1 h), 95% ethanol (1 h), 95% ethanol (1 h 30), absolute ethanol (1 h 30), absolute ethanol (2 h × 2), xylene (1 h), xylene (1 h 30), and paraffin (2 h 30 × 2). Paraffin used was Surgipath Paraplast (ref. 39601006), and xylene was Xylenes 98% pure (Acros Organics™, ref. 383930050).

Paraffin blocks were sectioned at 5 µm thickness using a Leica RM2245 microtome. Sections were collected on glass slides with a drop of water, stretched on a warm plate below the paraffin melting point (≤ 56 °C), and air-dried overnight at 35 °C. Slides were deparaffinized, rinsed in running water for 5 min, stained with Harris hematoxylin (Papanicolaou Harris hematoxylin, Bio-Optica, ref. 05-12011) for 3 min, rinsed again for 5 min, and counterstained with eosin Y 1% (1 g eosin Y, Acros Organics, ref. 152881000, in 100 mL Milli-Q water) for 3 min. Sections were dehydrated, cleared, and mounted with Eukitt. Slides were digitized using a Zeiss Axio Scan.Z1 automated slide scanner (Zeiss, Germany). Adipocyte morphology was quantified using ImageJ software (NIH, USA) with the home-made plugin to determine mean adipocyte area and size distribution.

**SUPPLEMENTARY FIGURES**

**LEGENDS**

**Supplementary Figure 1:** Elevated plus maze performance across male and female cohorts following chemogenetic inhibition of OT-expressing neurons.
The number of entries into the open arms and the time spent in the open arms were quantified after inhibition at the neonatal stage (a), juvenile stage (b), and young adult stage (c). Data are presented as median and interquartile range. Statistical significance between groups was assessed using the Wilcoxon–Mann–Whitney test.

**Supplementary Figure 2: Spontaneous Glutamatergic and GABAergic synaptic activity of CA3 pyramidal neurons in the anterior hippocampus region in mice following chemoinhibition of OT-expressing neurons during infancy (Cre+) compared to controls (Cre-) mice.**

(a) Schematic representation of the experimental protocol. Whole-cell recordings performed on CA3 pyramidal neurons were performed at a holding potential of −45 and -70 mV. The glutamatergic synaptic currents are inwards at -70 mV and the GABAergic synaptic currents are outwards at -45 mV. (b) Examples of whole-cell recordings performed on CA3 pyramidal neurons at a holding potential of −45 and -70 mV at P50. (c-d) Box plots of the frequency of GABA-sPSCs (c) and Glut-sPSCs (d). e-f) Box plots of the amplitude of GABA-sPSCs (e) and Glut-sPSCs (f).

*Cre+* (N= 4, n=12) and Cre- (N=4, n=13) have been analyzed, with N: number of mice and n: number of recorded cells. Data represented in whisker-plots report the different values of recorded cells with mean ±SEM, with scattered plots showing individual data points: sGABA frq Cre- (20.1 ± 2.7); sGABA frq Cre+ (25.7± 3.3); sGlut frq Cre- (17.8 ± 2.8); sGlut frq Cre+ (18.9 ± 2.2); sGABA Ampl Cre- (25.7± 1.5); sGABA Ampl Cre+ (23.8 ± 2); sGlut Ampl Cre- (29.5± 2); sGlut Ampl Cre+ (28.8 ± 3.1).

Statistical significance between groups was determined Mann Whitney test

**Supplementary Figure 3: Fetal oxytocin expression in the brain and placenta of E18.5 OT-Cre::Ai14 fetuses.**
OT-Cre::Ai14 fetuses were generated by crossing an Ai14 (RCL-tdTomato) female with an OT-Cre male, allowing the visualization of OT expression via tdTomato fluorescence in fetal brain and placenta, but not in maternal tissues. OT expression, irrespective of maternal or fetal origin, was detected using an anti-OT antibody (green). (a, d) Immunohistochemistry using an anti-OT antibody in the brain (a) and placenta (d) of E18.5 fetuses. (b, e) Immunohistochemistry using an anti-tdTomato antibody in the brain (b) and placenta (e) of E18.5 fetuses. (c) Merged image in the brain.
